1        **Chromosomally Encoded *mcr-5* in Colistin Non-susceptible *Pseudomonas aeruginosa***

2 Erik Snesrud, Rosslyn Maybank, Yoon I. Kwak, Anthony R. Jones, Mary K. Hinkle, and Patrick

3 Mc Gann<sup>#</sup>

4

5 Multi-drug resistant organism Repository and Surveillance Network, Walter Reed Army Institute  
6 of Research, Silver Spring, MD.

7

8

9        **Running Title:** *mcr-5* in colistin-resistant *P. aeruginosa*

10

11

12

13

14 # Address correspondence to Patrick Mc Gann, [patrick.t.mcgann4.civ@mail.mil](mailto:patrick.t.mcgann4.civ@mail.mil)

15 **Abstract**

16 Whole genome sequencing (WGS) of historical *Pseudomonas aeruginosa* clinical isolates  
17 identified a chromosomal copy of *mcr-5* within a Tn3-like transposon in *P. aeruginosa* MRSN  
18 12280. The isolate was non-susceptible to colistin by broth microdilution and genome analysis  
19 revealed no mutations known to confer colistin resistance. To the best of our knowledge this is  
20 the first report of *mcr* in colistin non-susceptible *P. aeruginosa*.

## 21 **Manuscript**

22 *Pseudomonas aeruginosa* is a leading cause of infection among immunocompromised  
23 patients and those receiving treatment in Intensive Care Units (ICU) (1). Antimicrobial treatment  
24 of *P. aeruginosa* is challenging due to the intrinsic resistance of this species to many antibiotics  
25 and a proclivity to develop resistance to other antibiotics via point mutations in intrinsic genes  
26 (2, 3). Furthermore, *P. aeruginosa* can readily acquire transmissible antibiotic resistance (AbR)  
27 genes resulting in the emergence of successful multi- or extensively-drug resistant strains (4).  
28 The emergence of these resistant strains has resulted in a greater reliance on colistin (polymixin  
29 E) as a key antipseudomonal agent (5). Unfortunately, colistin resistance in *P. aeruginosa* has  
30 been extensively reported, primarily due to mutations in regulatory two-component systems (  
31 reviewed in (6)). However, colistin resistance mediated by the transferable colistin resistance  
32 gene *mcr* has not been described in this species to date. In this report we describe colistin non-  
33 susceptible *P. aeruginosa* MRSN 12280 carrying a chromosomal copy of *mcr-5*.  
34 *P. aeruginosa* MRSN 12280 was sequenced as part of a larger effort to sequence all *P.*  
35 *aeruginosa* isolates in the Multi-drug resistant organism Repository and Surveillance Network  
36 (MRSN) repository (n=2,440; manuscript in preparation). The isolate was cultured from a sacral  
37 wound of an elderly male patient treated in the USA in 2012. Minimum inhibitory concentrations  
38 (MICs) of colistin were determined using broth microdilution (BMD) with cation-adjusted  
39 Mueller Hinton broth (CA-MHB) according to the Clinical & Laboratory Standards Institute  
40 (CLSI) guidelines, and also with calcium-enhanced Mueller-Hinton (CE-MH) as recommended  
41 by Gwozdziński and colleagues for *Enterobacteriaceae* carrying *mcr* (7). *Escherichia coli*  
42 MRSN 388734 carrying *mcr-1* (8) and *P. aeruginosa* ATCC 27298 were used as positive and  
43 negative controls, respectively. Colistin MICs were 4µg/ml (intermediate) and 8µg/ml (resistant)

44 for *P. aeruginosa* MRSN 12280 in CA-MH and CE-MH medium, respectively (**Table 1**).

45 Notably, the MIC of colistin in the control strains *E. coli* MRSN 388734 and *P. aeruginosa*

46 ATCC 27298 also increased in CE-MH, but interpretations did not change (**Table 1**).

47 Short and long-read whole genome sequencing (WGS) was performed on a NextSeq 550

48 (Illumina, San Diego, CA) and PacBio RS II (Pacific Biosciences, Menlo Park, CA),

49 respectively, as previously described (9). *In silico* multi-locus sequence typing (MLST) assigned

50 *P. aeruginosa* MRSN 12280 to a novel sequence type (ST) that is a single-loci variant of ST-

51 2613. An analysis of the WGS data detected five AbR genes that are commonly found in *P.*

52 *aeruginosa* (*aph(3')-IIB*, *bla<sub>OXA-50</sub>*, *bla<sub>PAO</sub>*, *catB7*, and *fosA*) and the recently described colistin

53 resistance gene, *mcr-5* (10). *Mcr-5* was first reported in 2017 in a cluster of colistin non-

54 susceptible *Salmonella enterica* and shares a protein sequence identity of just 36.11% with *Mcr-*

55 1 (10). Borowiak and colleagues reported that the gene was part of a Tn3-family transposon that

56 was found primarily on small, multi-copy ColE-type plasmids. However, in one isolate (*S.*

57 *enterica* 12-02546-2) the gene was present in a single copy on the chromosome and had a

58 colistin MIC of 4mg/L (10). In *P. aeruginosa* MRSN 12280, a single copy of *mcr-5* was also

59 present on the chromosome and was part of an 8,522bp Tn3-family transposon. This transposon

60 was identical to the one described by Borowiak and colleagues except for the insertion of IS5

61 into a gene encoding a putative major facilitator superfamily (MFS) directly downstream of *mcr-*

62 5 (**Figure 1**). The transposon was flanked by 38bp inverted repeats (IR) and generated a 5bp

63 target site duplication (TCCAT) upon insertion.

64 Colistin resistance in *P. aeruginosa* has primarily been attributed to mutations in up to

65 five different two-component regulatory systems (PhoPQ, PmrAB, ParR/S, ColR/S, and CprR/S)

66 (Reviewed in (6)) but to the best of our knowledge, *Mcr*-mediated colistin resistance has not

67 been described in *P. aeruginosa* to date. As mutations in the two-component regulatory systems  
68 could potentially contribute to colistin resistance in *P. aeruginosa* MRSN 12280, we examined  
69 the amino acid sequences of PmrA, PmrB, PmrE, PhoQ, ParR, ParS, ColR, ColS, MigA, LpxC,  
70 and CprS for non-synonymous mutations (6, 11-13). When compared to *P. aeruginosa* PA01, *P.*  
71 *aeruginosa* MRSN 12280 had non-synonymous mutations in PhoQ (Y85F), PmrA (L71R),  
72 PmrB (S2P, A4T, G68S, Y345H, G362S), ParR (L153R, S170N), and ParS (H398R). However,  
73 all of the mutations in PhoQ, PmrA, and PmrB have previously been reported in colistin  
74 sensitive strains (12, 13). An analysis of 1,135 *parS* genes from the National Center for  
75 Biotechnology Information (NCBI) revealed that 1,117 sequences have an arginine at position  
76 398, indicating that the ParS protein from *P. aeruginosa* PA01 is a poor representative of ParS in  
77 *P. aeruginosa*. Finally, a search of NCBI for the L153R and S170N mutations in ParR revealed  
78 that these mutations are present in a cluster of *P. aeruginosa* belonging to ST-235 from East  
79 Asia. *P. aeruginosa* VRFP04 from this cluster has been analyzed in detail and it is colistin  
80 sensitive (14). Though additional experiments are underway to confirm these findings, the data  
81 strongly suggests that colistin non-susceptibility in *P. aeruginosa* MRSN 12280 is due to Mcr-5.

82         We report the first identification of *mcr-5* in a colistin non-susceptible strain of *P.*  
83 *aeruginosa*. The gene was chromosomally encoded and embedded within a Tn3-family  
84 transposon that was related to the original transposon carrying *mcr-5* (10). Of note, while part of  
85 Mcr-5 and the transposon were identified in two *P. aeruginosa* assemblies using BLASTp (10),  
86 no other *P. aeruginosa* isolate in the MRSN repository contained the gene. This suggests that  
87 *mcr-5* is not widely distributed in this species but has the potential to disseminate via the Tn3-  
88 family transposon.

89 **Acknowledgements**

90 This publication made use of the *Pseudomonas aeruginosa* MLST website (<https://pubmlst.org/paeruginosa/>) developed by Keith Jolley and sited at the University of Oxford (Jolley & Maiden  
91 2010, BMC Bioinformatics, 11:595). The development of this site has been funded by the  
92 Wellcome Trust.  
93

94 This study was funded by the U.S. Army Medical Command, the Global Emerging Infections  
95 Surveillance and Response System, and the Defence Medical Research and Development  
96 Program. Material has been reviewed by the Walter Reed Army Institute of Research. There is  
97 no objection to its presentation. The opinions or assertions contained herein are the private views  
98 of the authors and are not to be construed as official, or reflecting the views of the Department of  
99 the Army or the Department of Defence.

## 100 Bibliography

- 101
- 102 1. Kerr KG, Snelling AM. 2009. *Pseudomonas aeruginosa*: a formidable and ever-present  
103 adversary. J Hosp Infect 73:338-44.
- 104 2. Livermore DM. 2002. Multiple mechanisms of antimicrobial resistance in *Pseudomonas*  
105 *aeruginosa*: our worst nightmare? Clin Infect Dis 34:634-40.
- 106 3. Poole K. 2011. *Pseudomonas aeruginosa*: resistance to the max. Front Microbiol 2:65.
- 107 4. Oliver A, Mulet X, Lopez-Causape C, Juan C. 2015. The increasing threat of  
108 *Pseudomonas aeruginosa* high-risk clones. Drug Resist Updat 21-22:41-59.
- 109 5. Montero M, Horcajada JP, Sorli L, Alvarez-Lerma F, Grau S, Riu M, Sala M, Knobel H.  
110 2009. Effectiveness and safety of colistin for the treatment of multidrug-resistant  
111 *Pseudomonas aeruginosa* infections. Infection 37:461-5.
- 112 6. Olaitan AO, Morand S, Rolain JM. 2014. Mechanisms of polymyxin resistance: acquired  
113 and intrinsic resistance in bacteria. Front Microbiol 5:643.
- 114 7. Gwozdziński K, Azarderakhsh S, Imirzalioglu C, Falgenhauer L, Chakraborty T. 2018.  
115 An improved medium for colistin susceptibility testing. J Clin Microbiol  
116 doi:10.1128/JCM.01950-17.
- 117 8. McGann P, Snesrud E, Maybank R, Corey B, Ong AC, Clifford R, Hinkle M, Whitman  
118 T, Lesho E, Schaecher KE. 2016. *Escherichia coli* Harboring *mcr-1* and *bla*<sub>CTX-M</sub> on a  
119 Novel IncF Plasmid: First Report of *mcr-1* in the United States. Antimicrob Agents  
120 Chemother 60:4420-1.
- 121 9. Snesrud E, Ong AC, Corey B, Kwak YI, Clifford R, Gleeson T, Wood S, Whitman TJ,  
122 Lesho EP, Hinkle M, McGann P. 2017. Analysis of Serial Isolates of *mcr-1*-Positive

- 123 *Escherichia coli* Reveals a Highly Active IS*ApII* Transposon. Antimicrob Agents  
124 Chemother 61.
- 125 10. Borowiak M, Fischer J, Hammerl JA, Hendriksen RS, Szabo I, Malorny B. 2017.  
126 Identification of a novel transposon-associated phosphoethanolamine transferase gene,  
127 *mcr-5*, conferring colistin resistance in d-tartrate fermenting *Salmonella enterica* subsp.  
128 *enterica* serovar Paratyphi B. J Antimicrob Chemother 72:3317-3324.
- 129 11. Dosselmann B, Willmann M, Steglich M, Bunk B, Nubel U, Peter S, Neher RA. 2017.  
130 Rapid and Consistent Evolution of Colistin Resistance in Extensively Drug-Resistant  
131 *Pseudomonas aeruginosa* during Morbidostat Culture. Antimicrob Agents Chemother 61.
- 132 12. Lee JY, Chung ES, Na IY, Kim H, Shin D, Ko KS. 2014. Development of colistin  
133 resistance in *pmrA*-, *phoP*-, *parR*- and *cprR*-inactivated mutants of *Pseudomonas*  
134 *aeruginosa*. J Antimicrob Chemother 69:2966-71.
- 135 13. Lee JY, Ko KS. 2014. Mutations and expression of PmrAB and PhoPQ related with  
136 colistin resistance in *Pseudomonas aeruginosa* clinical isolates. Diagn Microbiol Infect  
137 Dis 78:271-6.
- 138 14. Murugan N, Malathi J, Umashankar V, Madhavan HN. 2016. Resistome and  
139 pathogenomics of multidrug resistant (MDR) *Pseudomonas aeruginosa* VRFPA03,  
140 VRFPA05 recovered from alkaline chemical keratitis and post-operative endophthalmitis  
141 patient. Gene 578:105-11.

142

143



144 **Table 1. Colistin susceptibility testing**

| Strain                          | MIC of colistin in <sup>1</sup> |       |
|---------------------------------|---------------------------------|-------|
|                                 | CA-MH                           | CE-MH |
| <i>P. aeruginosa</i> MRSN 12280 | 4                               | 8     |
| <i>E. coli</i> MRSN 388634      | 8                               | 16    |
| <i>P. aeruginosa</i> ATCC 27298 | 0.25                            | 1     |

145 Abbreviations used: MIC, minimum inhibitory concentration; CA-MH, cation-adjusted Mueller

146 Hinton; CE-MH, Calcium-enhanced Mueller Hinton.

147 <sup>1</sup> MICs were performed in BMD according to CLSI guidelines. Results represent the average

148 value from three independent tests.

149 **Figure Legends**

150 **Figure 1. Alignment of Tn3-family transposons carrying *mcr-5*.** Comparison of the Tn3-like  
151 transposon carrying *mcr-5* in plasmid pSE13-SA01718 from *Salmonella enterica* (10) with the  
152 Tn3-like transposon carrying *mcr-5* in *P. aeruginosa* MRSN 12280. Transposons are encased in  
153 a rectangle with the inverted repeats (IR) depicted as shaded, rotated triangles. Open arrows  
154 represent coding sequences (red arrows, *mcr-5*; white arrows, genes associated with DNA  
155 mobility; grey arrows, other genes) and indicate direction of transcription.

156

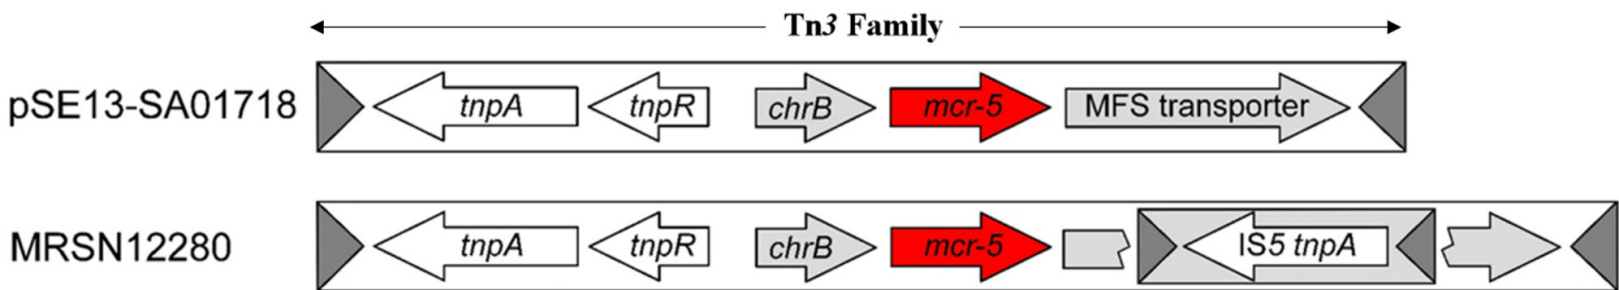

Source: http://biorxiv.org/content/10.1101/297028v1.full.pdf
